# Supplementary material
Source: PubMed Central journal article supplement (PMC6604095)
Supplement: jamapediatr-173-e191744-s001.pdf [file jamapediatr-173-e191744-s001.pdf]

## Supplementary Online Content

Zallman L, Finnegan KE, Himmelstein DU, Touw S, Woolhandler S. Implications of changing public charge immigration rules for children who need medical care.

*JAMA Pediatr.* Published online July 1, 2019.

doi:10.1001/jamapediatrics.2019.1744

**eTable 1.** Demographic Characteristics of Children With “Medical Need” at Risk of Losing Medicaid/CHIP Benefits Due to Proposed Public Charge Rules

**eTable 2.** Medical Conditions and Care Needs of Children With “Medical Need” at Risk of Losing Medicaid/CHIP

This supplementary material has been provided by the authors to give readers additional information about their work.

**eTable 1.** Demographic Characteristics of Children With “Medical Need” at Risk of Losing Medicaid and CHIP Benefits Because of Proposed Public Charge Rules

| Characteristics              | Children at risk<br>(n=1,315) |               |                        | Children not at risk<br>(n=2,582) |               |                        | P Value |
|------------------------------|-------------------------------|---------------|------------------------|-----------------------------------|---------------|------------------------|---------|
|                              | Unweighted<br>N               | Weighted<br>N | Weighted %<br>(95% CI) | Unweighted<br>N                   | Weighted<br>N | Weighted %<br>(95% CI) |         |
| Total children               |                               |               |                        |                                   |               |                        |         |
| Children with “medical need” | 1,315                         | 5,376,498     | 64.6 (61.6-67.6)       | 2,582                             | 18,878,292    | 76.1 (73.9-78.4)       | <.001   |
| Age                          |                               |               |                        |                                   |               |                        |         |
| 0-5                          | 487                           | 2,219,050     | 41.3 (37.3-45.3)       | 871                               | 6,879,242     | 36.4 (33.6-39.2)       | .08     |
| 6-12                         | 542                           | 2,012,825     | 37.4 (34.0-40.9)       | 1,071                             | 7,398,134     | 39.2 (36.8-41.6)       |         |
| 13-17                        | 286                           | 1,144,622     | 21.3 (18.4-24.2)       | 640                               | 4,600,915     | 24.4 (21.7-27.1)       |         |
| Sex                          |                               |               |                        |                                   |               |                        |         |
| Male                         | 711                           | 2,905,676     | 54.0 (50.0-58.0)       | 1,375                             | 9,672,485     | 51.2 (48.6-53.9)       | .26     |
| Female                       | 604                           | 2,470,821     | 46.0 (42.0-50.0)       | 1,207                             | 9,205,807     | 48.8 (46.1-51.4)       |         |
| Income (% FPL)               |                               |               |                        |                                   |               |                        |         |
| 0-249                        | 1,225                         | 4,752,490     | 88.4 (85.3-91.5)       | 2,288                             | 15,489,430    | 82.0 (78.8-85.3)       | .02     |
| 250-399                      | 62                            | 404,855       | 7.5 (5.2-9.9)          | 219                               | 2,161,391     | 11.4 (9.0-13.9)        |         |
| ≥400                         | 28                            | 219,153       | 4.1 (2.0-6.1)          | 75                                | 1,227,472     | 6.5 (4.3-8.7)          |         |
| Race/ethnicity               |                               |               |                        |                                   |               |                        |         |
| Hispanic                     | 1,119                         | 4,283,805     | 78.7 (74.3-85.1)       | 798                               | 3,791,659     | 20.1 (17.0-23.2)       | <.001   |
| White, Non-Hispanic          | 41                            | 255,658       | 4.8 (1.8-7.7)          | 655                               | 8,443,827     | 44.7 (40.4-49.1)       |         |
| Black, Non- Hispanic         | 66                            | 398,730       | 7.4 (3.9-10.9)         | 897                               | 4,509,458     | 23.9 (20.3-27.5)       |         |
| Asian                        | 74                            | 356,558       | 6.6 (4.0-9.2)          | 40                                | 262,511       | 1.4 (0.6-2.2)          |         |
| Other                        | 15                            | 81,747        | 1.5 (0.3-2.8)          | 192                               | 1,870,837     | 9.9 (6.5-13.4)         |         |
| Immigration status           |                               |               |                        |                                   |               |                        |         |
| Citizen                      | 1,059                         | 4,030,632     | 91.8 (88.9-94.8)       | 2,113                             | 14,861,605    | 99.9 (99.9-100.0)      | <.001   |
| Non-citizen                  | 63                            | 357,893       | 8.1 (5.2-11.1)         | 2                                 | 7,956         | 0.05 (0-0.14)          |         |

Abbreviations: FPL = federal poverty level, CHIP=Children’s Health Insurance Plan

**eTable 2.** Medical Conditions and Care Needs of Children With “Medical Need” at Risk of Losing Medicaid and CHIP Because of Public Charge Rules

|                                                      | Children at risk<br>(n=1,315) |               |                        | Children not at risk<br>(n=2,582) |               |                        | P Value |
|------------------------------------------------------|-------------------------------|---------------|------------------------|-----------------------------------|---------------|------------------------|---------|
|                                                      | Unweighted<br>N               | Weighted<br>N | Weighted %<br>(95% CI) | Unweighted<br>N                   | Weighted<br>N | Weighted %<br>(95% CI) |         |
| <b>Total children with<br/>“medical need”</b>        | 1,315                         | 5,376,498     |                        | 2,582                             | 18,878,292    |                        |         |
| <b>Received a medical<br/>diagnosis in last year</b> | 1,001                         | 4,165,868     | 77.5 (74.4-80.5)       | 2,028                             | 14,937,277    | 79.1 (77.2-81.1)       | .36     |
| Asthma**                                             | 156                           | 615,842       | 11.5 (9.2-13.7)        | 615                               | 3,528,654     | 18.7 (16.4-21.0)       | <.001   |
| Attention deficit<br>/hyperactivity disorder         | 78                            | 314,813       | 6.1 (4.4-7.9)          | 463                               | 3,533,304     | 19.6 (17.5-21.7)       | <.001   |
| Other respiratory<br>condition *                     | 367                           | 1,512,031     | 32.3 (27.5-37.0)       | 555                               | 4,484,680     | 27.0 (23.9-30.2)       | .07     |
| Influenza**                                          | 153                           | 662,150       | 14.1 (10.5-17.8)       | 205                               | 1,597,558     | 9.6 (7.4-11.8)         | .03     |
| Gastrointestinal                                     | 190                           | 857,703       | 18.3 (15.2-21.5)       | 361                               | 3,027,363     | 18.2 (15.2-21.3)       | .98     |
| Ear infection                                        | 127                           | 576,870       | 12.3 (9.2-15.4)        | 272                               | 2,398,220     | 14.5 (11.7-17.2)       | .34     |
| Musculoskeletal and<br>rheumatologic                 | 111                           | 427,416       | 9.1 (7.3-11.0)         | 225                               | 1,750,310     | 10.5 (9.1-12.0)        | .26     |
| Epilepsy**                                           | 13                            | 53,728        | 1.1 (0.5-1.8)          | 29                                | 209,951       | 1.3 (0.7-1.8)          | .80     |
| Mental health                                        | 18                            | 79,791        | 1.7 (0.6-2.8)          | 96                                | 809,079       | 4.9 (3.5-6.2)          | .001    |
| Ear,nose,throat,mouth,<br>and sensory                | 206                           | 834,849       | 17.8 (14.3-21.3)       | 359                               | 2,883,939     | 17.4 (15.0-19.7)       | .84     |
| Congenital abnormality<br>developmental disorder     | 39                            | 141,670       | 3.0 (2.0-4.0)          | 71                                | 620,330       | 3.7 (2.6-4.9)          | .37     |
| Genitourinary                                        | 32                            | 153,404       | 3.3 (1.9-4.7)          | 57                                | 463,278       | 2.8 (2.1-3.5)          | .51     |
| Circulatory disorder                                 | 18                            | 61,414        | 1.3 (0.6-2.0)          | 42                                | 314,332       | 1.9 (1.1-2.6)          | .27     |
| Other                                                | 53                            | 216,515       | 4.6 (2.8-6.4)          | 136                               | 1,047,197     | 6.3 (4.9-7.7)          | .13     |
| <b>Disabled</b>                                      | 145                           | 583,700       | 10.9 (8.9-12.8)        | 530                               | 4,042,018     | 21.4 (18.8-24.0)       | <.001   |
| Functionally impaired<br>including walking           | 69                            | 321,666       | 6.2 (4.4-7.9)          | 280                               | 2,068,606     | 11.2 (9.1-13.4)        | .006    |

|                                             |     |           |                  |       |            |                  |       |
|---------------------------------------------|-----|-----------|------------------|-------|------------|------------------|-------|
| limitations or using assistive device       |     |           |                  |       |            |                  |       |
| Disabled due to mental health condition     | 90  | 347,302   | 10.4 (7.9-12.9)  | 349   | 2,717,310  | 21.6 (18.8-24.3) | <.001 |
| <b>Needed specific treatment</b>            | 877 | 3,648,687 | 67.9 (64.1-71.6) | 1,946 | 14,894,799 | 78.9 (76.6-81.2) | <.001 |
| All newborns                                | 118 | 600,785   | 11.2 (8.8-13.6)  | 217   | 1,818,913  | 9.6 (8.1-11.2)   | .26   |
| Needed care for illness or injury           | 393 | 1,765,447 | 39.9 (35.3-44.4) | 1,028 | 8,625,030  | 53.5 (49.3-50.7) | <.001 |
| Any care, test, or treatment                | 335 | 1,314,471 | 25.1 (22.0-28.3) | 752   | 5,826,104  | 31.5 (28.9-34.1) | .002  |
| Specialist                                  | 253 | 1,095,951 | 21.0 (18.0-24.0) | 557   | 4,492,758  | 24.3 (21.5-27.1) | .10   |
| Prescribed medication                       | 222 | 944,343   | 18.1 (15.0-21.1) | 777   | 5,770,301  | 31.3 (28.7-33.9) | <.001 |
| Therapy (physical, speech, or occupational) | 128 | 548,008   | 10.5 (8.3-12.7)  | 346   | 2,565,068  | 13.9 (12.0-15.7) | .02   |
| Counseling                                  | 96  | 399,804   | 7.7 (5.4-9.9)    | 398   | 3,029,748  | 16.4 (14.2-18.5) | <.001 |

\* excluding allergic rhinitis, viral upper respiratory tract infections, and influenza

\*\* asthma, influenza, epilepsy, cancer, and diabetes are considered life threatening conditions

Abbreviations: CHIP=Children's Health Insurance Plan
